# Supplementary material for: Inventory of anthropogenic methane emissions in Mainland China from 1980 to 2010
Source: Copernicus journal article supplement (doi:10.5194/acp-2016-139), 2016-03-16

Figure S1. The relationship between Gross Domestic Product (GDP) and the fraction of municipal solid waste (MSW) treated by landfills.

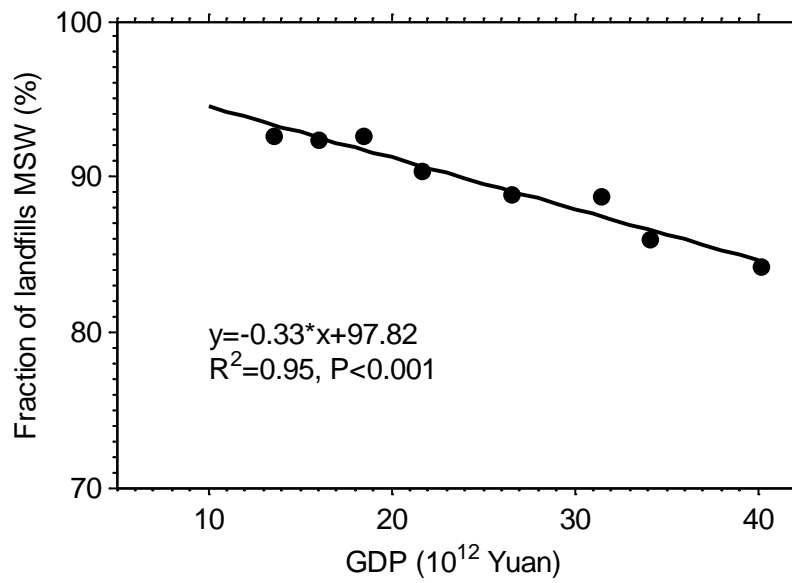

Figure S2. (a) The relationship between Gross Domestic Product (GDP) and COD in domestic sewage treated by wastewater treatment plants (WTPs). (b) The relationship between population and the total of COD in domestic sewage.

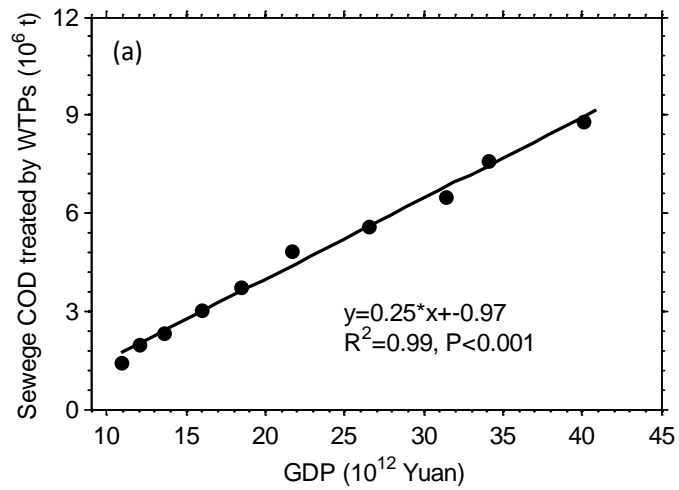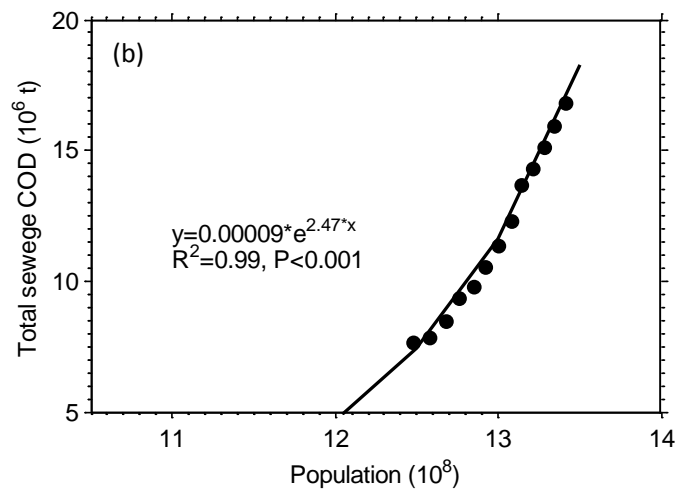

Figure S3. (a) The relationship between industrial Gross Domestic Product (GDP) and COD in industrial wastewater treated by wastewater treatment plants (WTPs). (b) The relationship between GDP and the fraction of COD in industrial wastewater discharged into rivers, lakes and ocean to the total COD in industrial wastewater.

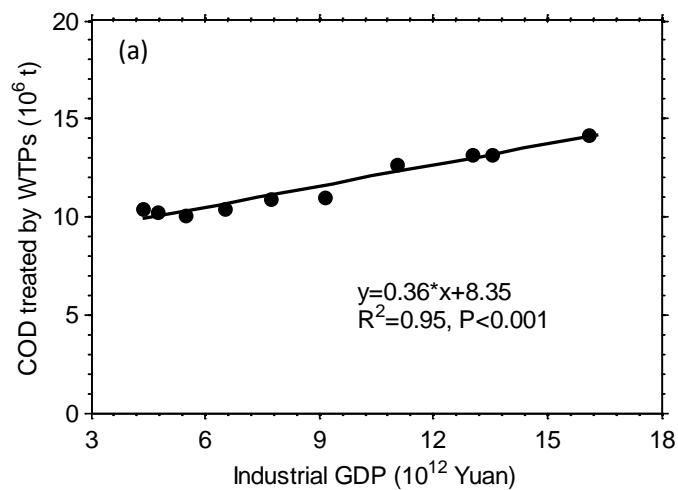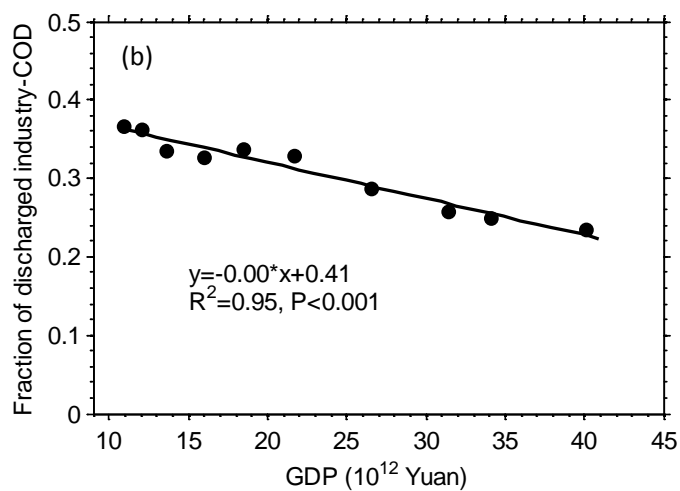

Figure S4. (a) Provinces and (b) regions in Mainland China.

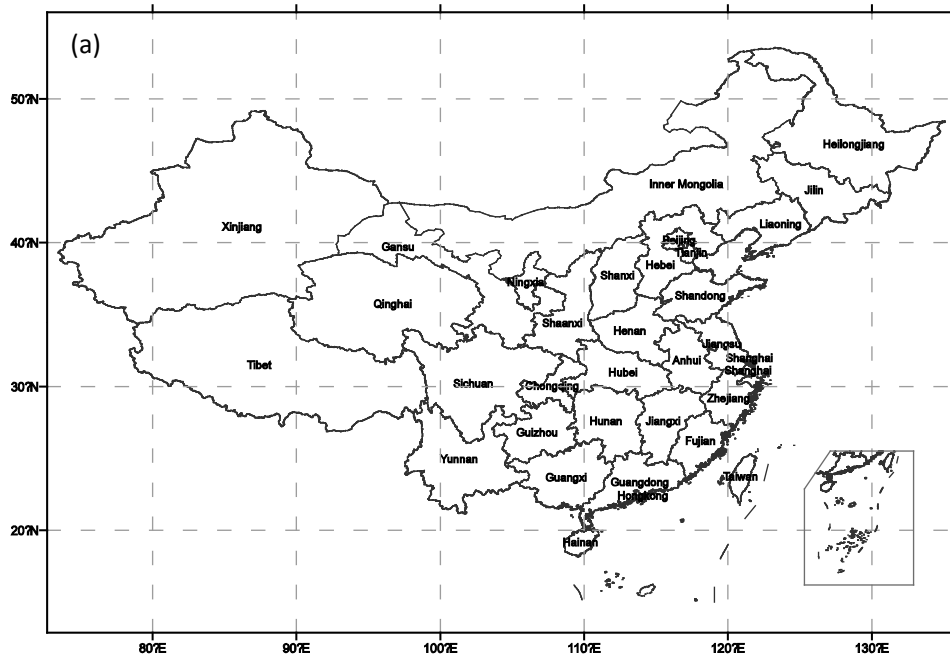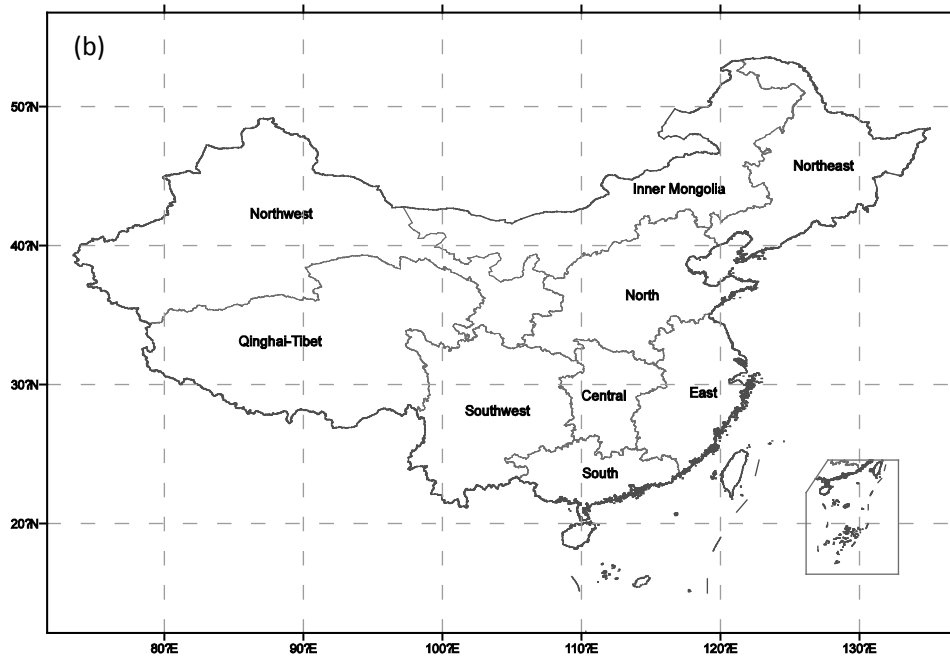

Supplement: Supplementary file 1 [file acp-2016-139-supplement.pdf]
